# Supplementary material for: Histone lysine methyltransferase G9a is a novel epigenetic target for the treatment of hepatocellular carcinoma
Source: PubMed Central journal article supplement (PMC5400586; doi:10.18632/oncotarget.15528), 2017-02-20
Supplement: oncotarget-08-21315-s001.pdf [file oncotarget-08-21315-s001.pdf]

## Histone lysine methyltransferase G9a is a novel epigenetic target for the treatment of hepatocellular carcinoma

### Supplementary Materials

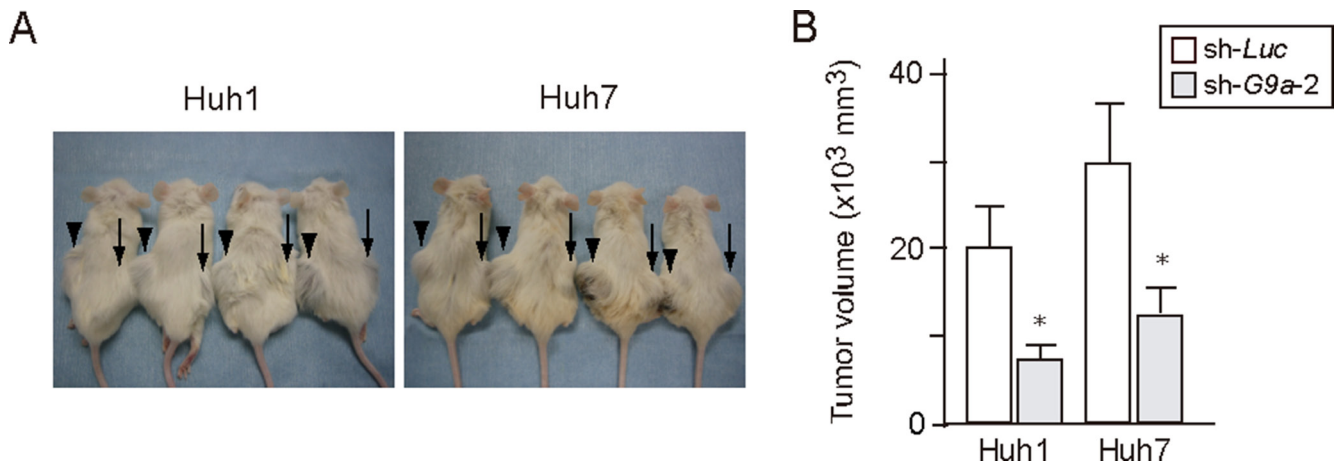

**Supplementary Figure 1: Xenograft transplantation in NOD/SCID mice.** (A) In total,  $2 \times 10^6$  *G9a* knockdown Huh1 and Huh7 cells were separately implanted into the subcutaneous space of NOD/SCID mice. *G9a* knockdown cells developed apparently smaller tumors in the right subcutaneous space (arrows) than sh-*Luc*-expressing control cells in the left space (arrowheads) 6 weeks after the transplantation ( $N = 5$  per group). (B) Tumor volume was estimated 6 weeks after transplantation. \*Statistically significant ( $p < 0.05$ ).

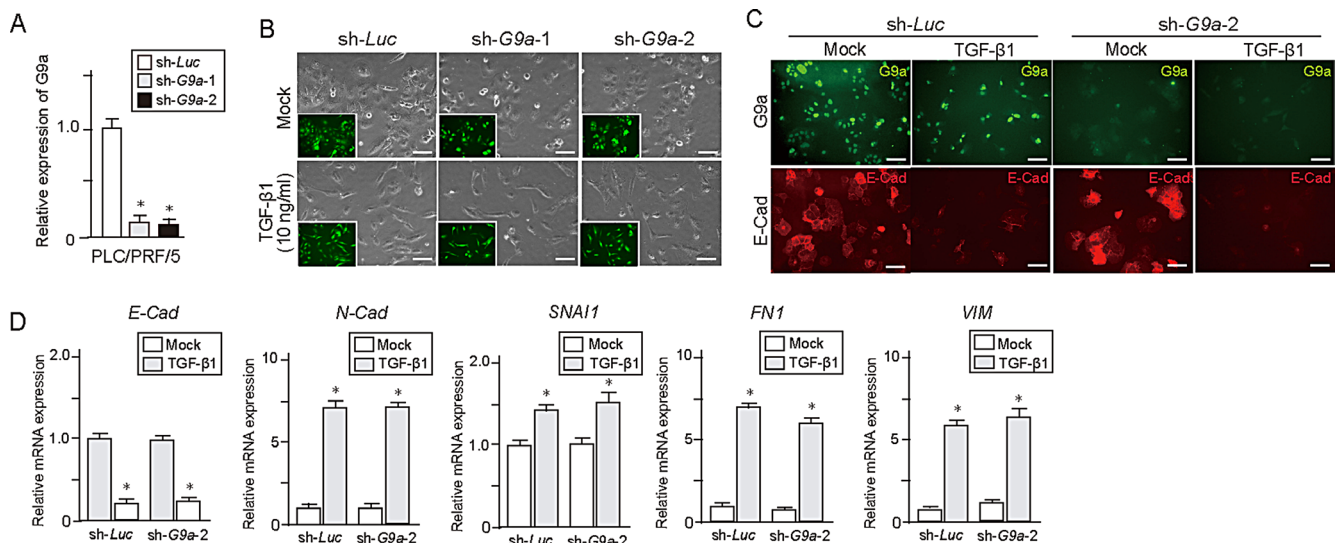

**Supplementary Figure 2: TGF- $\beta 1$ -induced EMT in *G9a* knockdown PLC/PRF/5 cells.** (A) Real-time RT-PCR analysis of *G9a* expression in stable *G9a* knockdown cells. Data sets were obtained from three independent experiments. \*Statistically significant ( $p < 0.05$ ). (B) Bright-field images of PLC/PRF/5 cells treated with TGF- $\beta 1$  for 48 hours. Fluorescence images are shown in insets. Scale bar = 100  $\mu\text{m}$ . (C) Immunocytochemical analyses for *G9a* (green) and E-cadherin (red) expression in PLC/PRF/5 cells. Scale bar = 100  $\mu\text{m}$ . (D) Real-time RT-PCR analysis of the expression of EMT markers in PLC/PRF/5 cells after TGF- $\beta 1$  treatment for 48 hours. Data sets were obtained from three independent experiments. \*Statistically significant ( $p < 0.05$ ).

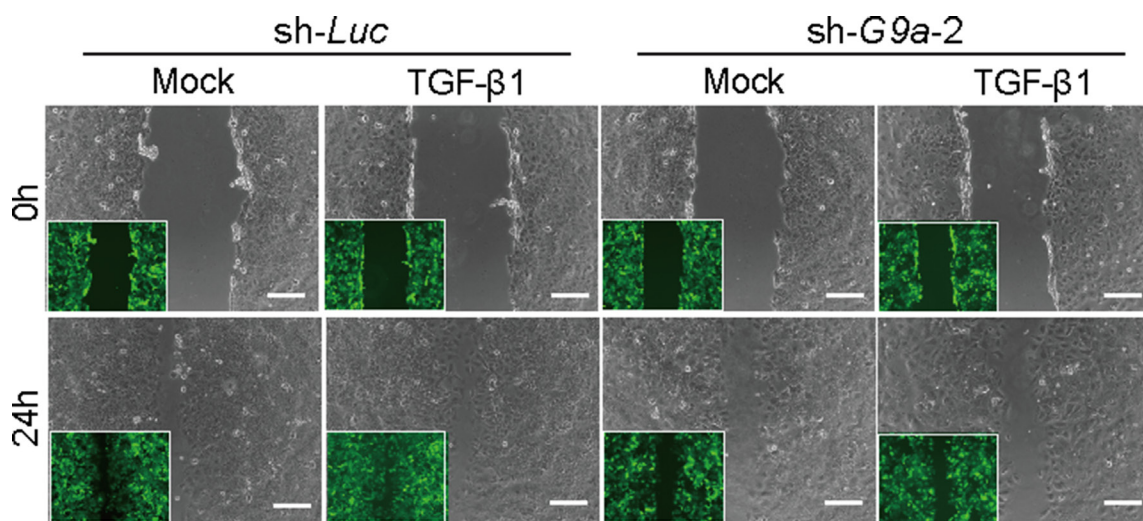

**Supplementary Figure 3: Wound healing assay of Huh7 cells.** No remarkable differences in migration ability were observed between control and *G9a* knockdown cells after *TGF-β1* treatment.

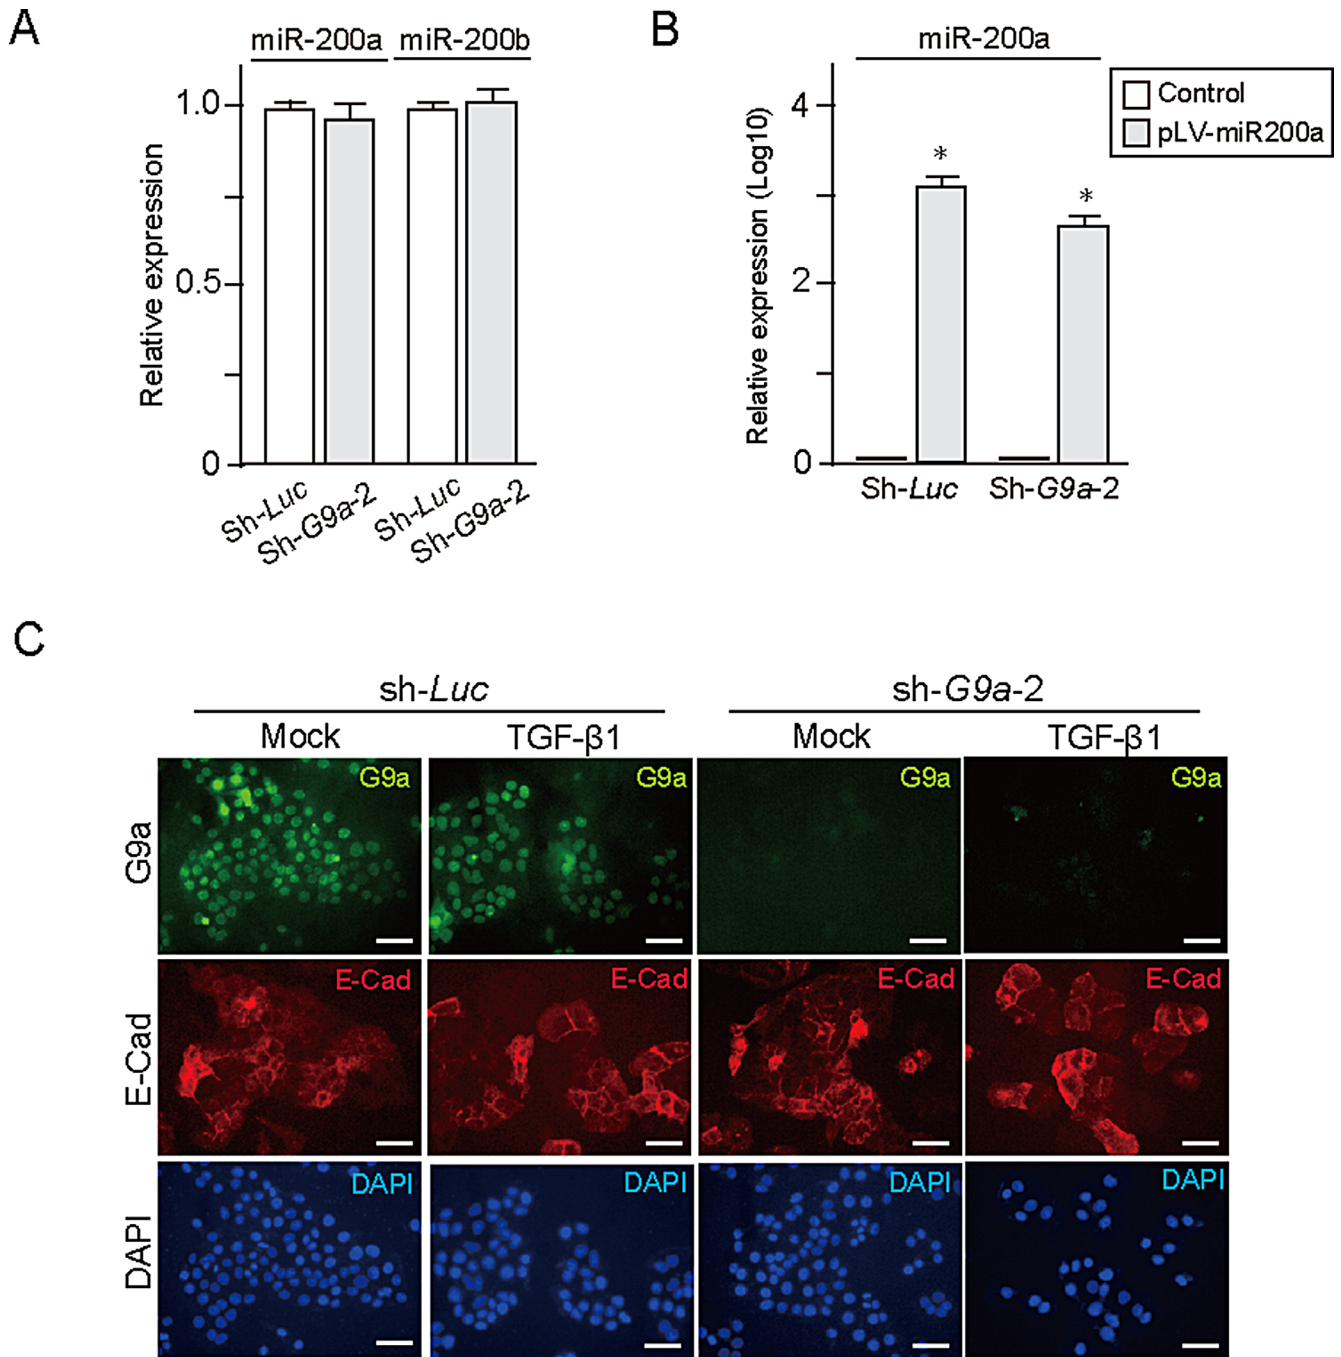

**Supplementary Figure 4: Role of miR-200 in *TGF-β1*-induced EMT in Huh7 cells.** (A) Expression of miR-200a and 200b in stable *G9a* knockdown cells was analyzed using real-time RT-PCR and normalized to U6. Data sets were obtained from three independent experiments. (B) Real-time RT-PCR analysis of miR-200a expression in *G9a* knockdown cells stably expressing miR-200a. Data sets were obtained from three independent experiments. (C) Immunocytochemical analyses of G9a (green) and E-cadherin (red) expression in *G9a* knockdown cells with miR-200a overexpression. Nuclei stained with DAPI (blue) are also shown. Scale bar = 100  $\mu$ m.

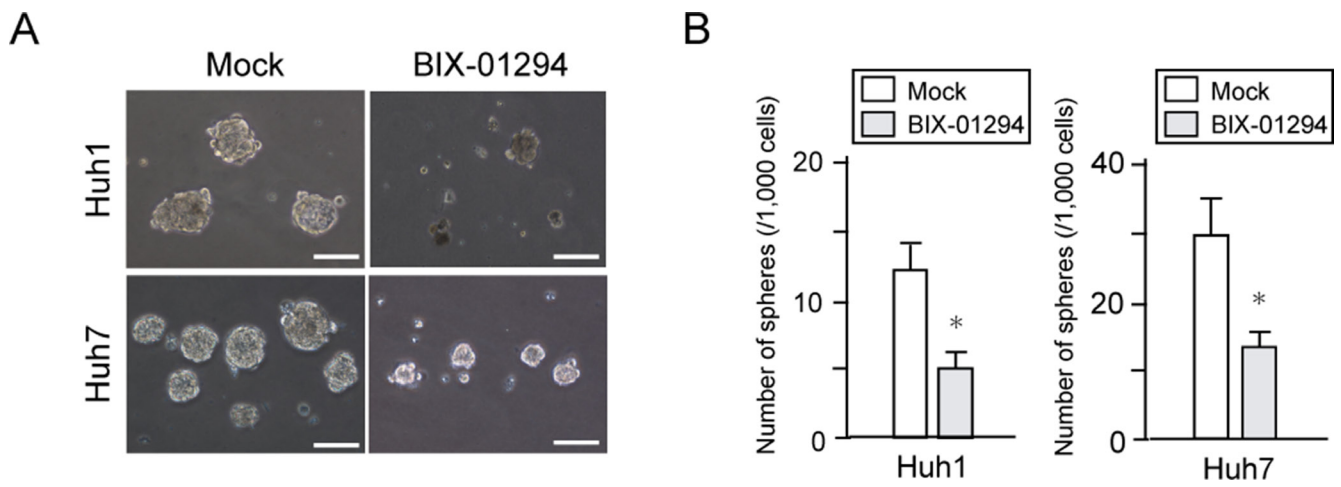

**Supplementary Figure 5: Non-adherent sphere formation assay of xenograft tumor-derived cells.** (A) Bright-field images of tumor cells in non-adherent spheres formed after 14 days of culture. (B) Number of large spheres (> 100  $\mu\text{m}$  in diameter) generated from 1,000 tumor-derived cells. Data sets were obtained from three independent experiments. \*Statistically significant ( $p < 0.05$ ).

**Supplementary Table 1: Potential target genes for G9a**

| RefSeq   | Definition                                                                 | RefSeq   | Definition                                                    |
|----------|----------------------------------------------------------------------------|----------|---------------------------------------------------------------|
| C7orf43  | chromosome 7 open reading frame 43                                         | HES4     | hairly and enhancer of split 4 (drosophila)                   |
| FBX02    | F-box protein 2                                                            | CLIC3    | chloride intracellular channel 3                              |
| TMEM82   | transmembrane protein 82                                                   | MTRNR2L9 | MT-RNR2-like 9                                                |
| CADM1    | cell adhesion molecule 1                                                   | SLC51A   | solute carrier family 51 alpha subunit                        |
| ISM2     | isthmin 2 homolog (zebrafish)                                              | TP53INP1 | tumor protein p53 inducible nuclear protein 1                 |
| BMP1     | bone morphogenetic protein 1                                               | CD55     | CD55 molecule                                                 |
| SERINC2  | serine incorporator 2                                                      | AKR1C2   | aldo-keto reductase family 1, member C2                       |
| SEC14L2  | SEC14-like 2 (s.cerevisiae)                                                | YPEL3    | yippee-like 3 (drosophila)                                    |
| IN080B   | IN080 complex subunit B                                                    | CYP1B1   | cytochrome P450, family 1, subfamily B, member 1              |
| VMA7     | von Willebrand factor A domain containing 7                                | TMEM151A | transmembrane protein 151A                                    |
| C2orf82  | chromosome 2 open reading frame 82                                         | CDKN1A   | cyclin-dependent kinase inhibitor 1A (p21, Cip1)              |
| ALDH3B1  | aldehyde dehydrogenase 3 family, member B1                                 | ACY1     | aminoacylase 1                                                |
| MOGAT3   | monoacylglycerol O-acyltransferase 3                                       | SPOCK2   | sparc/osteonectin, cwcv and kazal-like domains proteoglycan 2 |
| PPP1R3B  | protein phosphatase 1, regulatory subunit 3B                               | RTN4RL2  | reticulin 4 receptor-like 2                                   |
| LAMB2    | laminin, beta 2 (laminin S)                                                | RRAS     | related RAS viral (r-ras) oncogene homolog                    |
| PLAU     | plasminogen activator, urokinase                                           | C19orf33 | chromosome 19 open reading frame 33                           |
| SYT12    | synaptotagmin XII                                                          | SOCS2    | suppressor of cytokine signaling 2                            |
| TFF1     | trefoil factor 1                                                           | TRIB1    | tribbles homolog 1 (drosophila)                               |
| TIMP3    | TIMP metalloproteinase inhibitor 3                                         | ITPR3    | inositol 1,4,5-trisphosphate receptor, type 3                 |
| KLF2     | Kruppel-like factor 2 (lung)                                               | PPP1R13L | protein phosphatase 1, regulatory subunit 13 like             |
| TMEM176B | transmembrane protein 176B                                                 | CYP4F3   | cytochrome P450, family 4, subfamily F, member 3              |
| CRYL1    | crystallin, lambda 1                                                       | PLLP     | plasmalipin                                                   |
| ACP5     | acid phosphatase 5, tartrate resistant                                     | PMP22    | peripheral myelin protein 22                                  |
| ATP2B4   | ATPase, Ca <sup>2+</sup> transporting, plasma membrane 4                   | NDRG4    | NDRG family member 4                                          |
| JUNB     | jun B proto-oncogene                                                       | KCNMB4   | charybdotoxin receptor subunit beta-4                         |
| B4GALNT1 | beta-1, 4-N-acetyl-galactosaminyltransferase 1                             | INHBB    | inhibin, beta B                                               |
| GTPBP2   | GTP binding protein 2                                                      | TIMP1    | TIMP metalloproteinase inhibitor 1                            |
| ZFP36    | zinc finger protein 36, C3H type, homolog (mouse)                          | ADM      | adrenomedullin                                                |
| POLD4    | polymerase (DNA directed), delta 4                                         | BHLHE40  | basic helix-loop-helix family, member e40                     |
| DHRS3    | dehydrogenase/reductase (SDR family) member 3                              | OPTN     | optineurin                                                    |
| CAB39L   | calcium binding protein 39-like                                            | TUBB3    | tubulin, beta 3 class III                                     |
| MAPK11   | mitogen-activated protein kinase 11                                        | SPON2    | spondin 2, extracellular matrix protein                       |
| CXCL16   | chemokine (C-X-C motif) ligand 16                                          | NEU4     | neuraminidase 4                                               |
| OLFM2    | olfactomedin 2                                                             | COL7A1   | collagen, type VII, alpha 1                                   |
| LOXL2    | lysyl oxidase-like 2                                                       | LAMA3    | laminin, alpha 3                                              |
| LIF      | leukemia inhibitory factor                                                 | UAP1L1   | UDP-N-acetylglucosamine pyrophosphorylase 1 like 1            |
| MTSS1    | metastasis suppressor 1                                                    | SOCS3    | suppressor of cytokine signaling 3                            |
| TSKU     | tukushi small leucine rich proteoglycan homolog (xenopus laevis)           | SAA1     | serum amyloid A1                                              |
| KRT19    | keratin 19                                                                 | DKK3     | dickkopf 3 homolog (xenopus laevis)                           |
| PNRC1    | proline-rich nuclear receptor coactivator 1                                | SHH      | sonic hedgehog                                                |
| ANGPTL4  | angiopoietin-like 4                                                        | MXD1     | MAX dimerization protein 1                                    |
| SEZ6L2   | seizure related 6 homolog (mouse)-like 2                                   | FGF2     | fibroblast growth factor 2 (basic)                            |
| TAPBP    | TAP binding protein (tapasin)                                              | EGLN3    | egl-9 family hypoxia inducible factor 3                       |
| KLF4     | Kruppel-like factor 4                                                      | ADM2     | adrenomedullin 2                                              |
| TRPV2    | transient receptor potential cation channel, subfamily V, member 2         | LYPD6B   | LY6/PLAUR domain containing 6B                                |
| PDGFRA   | platelet-derived growth factor receptor, alpha polypeptide                 | PDLIM2   | PDZ and LIM domain 2                                          |
| IGFBP1   | insulin-like growth factor binding protein 1                               | C10orf91 | chromosome 10 open reading frame 91                           |
| MICAL1   | microtubule associated monooxygenase, calponin and LIM domain containing 1 | AGRN     | agrin                                                         |

**Supplementary Table 2: Primer sequences designed for real-time RT-PCR**

| Gene name    | Sequence                          |
|--------------|-----------------------------------|
| <i>G9a</i>   | Fw 5'- TTTCCGCATGAGTGATGATG -3'   |
|              | Rv 5'- GGGCAGAACCTAACTCCTCTG -3'  |
| <i>E-Cad</i> | Fw 5'- AAGTTTTCCACCAAAGTCACG -3'  |
|              | Rv 5'- TGCTTGGATTCCAGAAACG -3'    |
| <i>N-Cad</i> | Fw 5'- GGTGGAGGAGAAGAAGACCAG -3'  |
|              | Rv 5'- GGCATCAGGCTCCACAGT -3'     |
| <i>SNAIL</i> | Fw 5'- GCTGCAGGACTCTAATCCAGA -3'  |
|              | Rv 5'- ATCTCCGGAGGTGGGATG-3'      |
| <i>FNI</i>   | Fw 5'- GCCACTGGAGTCTTTACCACA -3'  |
|              | Rv 5'- CCTCGGTGTTGTAAGGTGGA -3'   |
| <i>VIM</i>   | Fw 5'- TACAGGAAGCTGCTGGAAGG -3'   |
|              | Rv 5'- ACCAGAGGGAGTGAATCCAG -3'   |
| <i>GAPDH</i> | Fw 5'- CTGACTTCAACAGCGACACC -3'   |
|              | Rv 5'- TAGCCAAATTCGTTGTCATACC -3' |

Fw, Forward, Rv, Reverse.
